# Supplementary material for: Biphasic assembly of the murine intestinal microbiota during early development
Source: PubMed Central journal article supplement — ISME J. 2013 Mar 28;7(6):1112–5. doi: 10.1038/ismej.2013.15 (PMC3660675; doi:10.1038/ismej.2013.15), 2013-03-28
Supplement: ismej201315x2.pdf [file ismej201315x2.pdf]

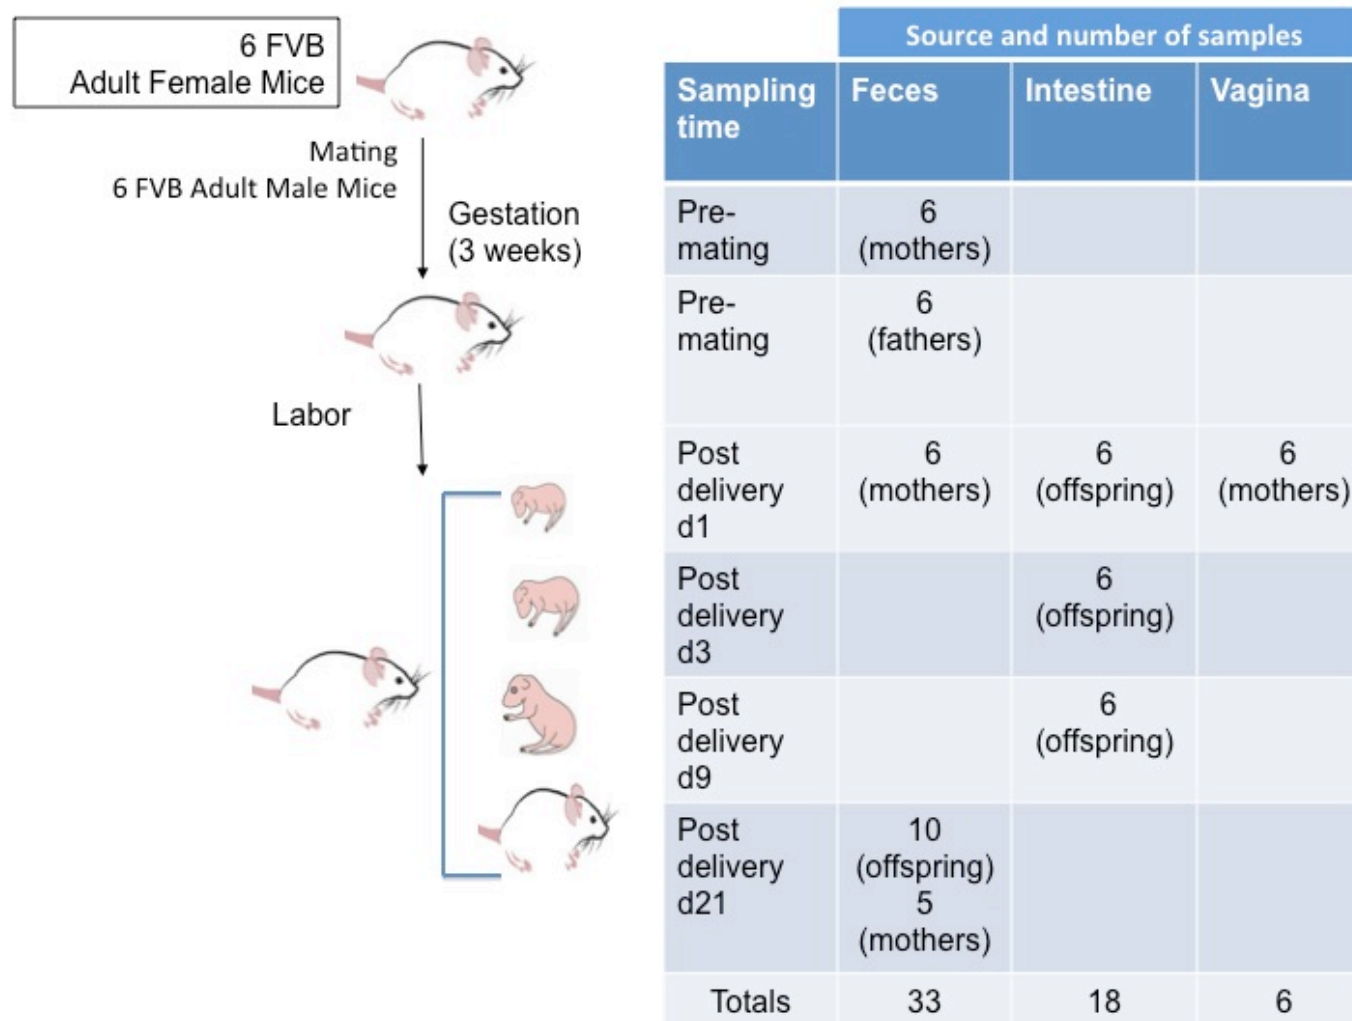

**Figure S1. Experimental design.** Six adult female FVB mice were sampled for feces, mated with males, and sampled after delivery (vagina and feces) and at 21 days (feces). The intestinal contents of the offspring (5 animals per mother) were sampled at ages 1, 3 and 9 days, and feces at 21 days.
