# Supplementary material for: Biphasic assembly of the murine intestinal microbiota during early development
Source: PubMed Central journal article supplement — ISME J. 2013 Mar 28;7(6):1112–5. doi: 10.1038/ismej.2013.15 (PMC3660675; doi:10.1038/ismej.2013.15), 2013-03-28
Supplement: ismej201315x4.pdf [file ismej201315x4.pdf]

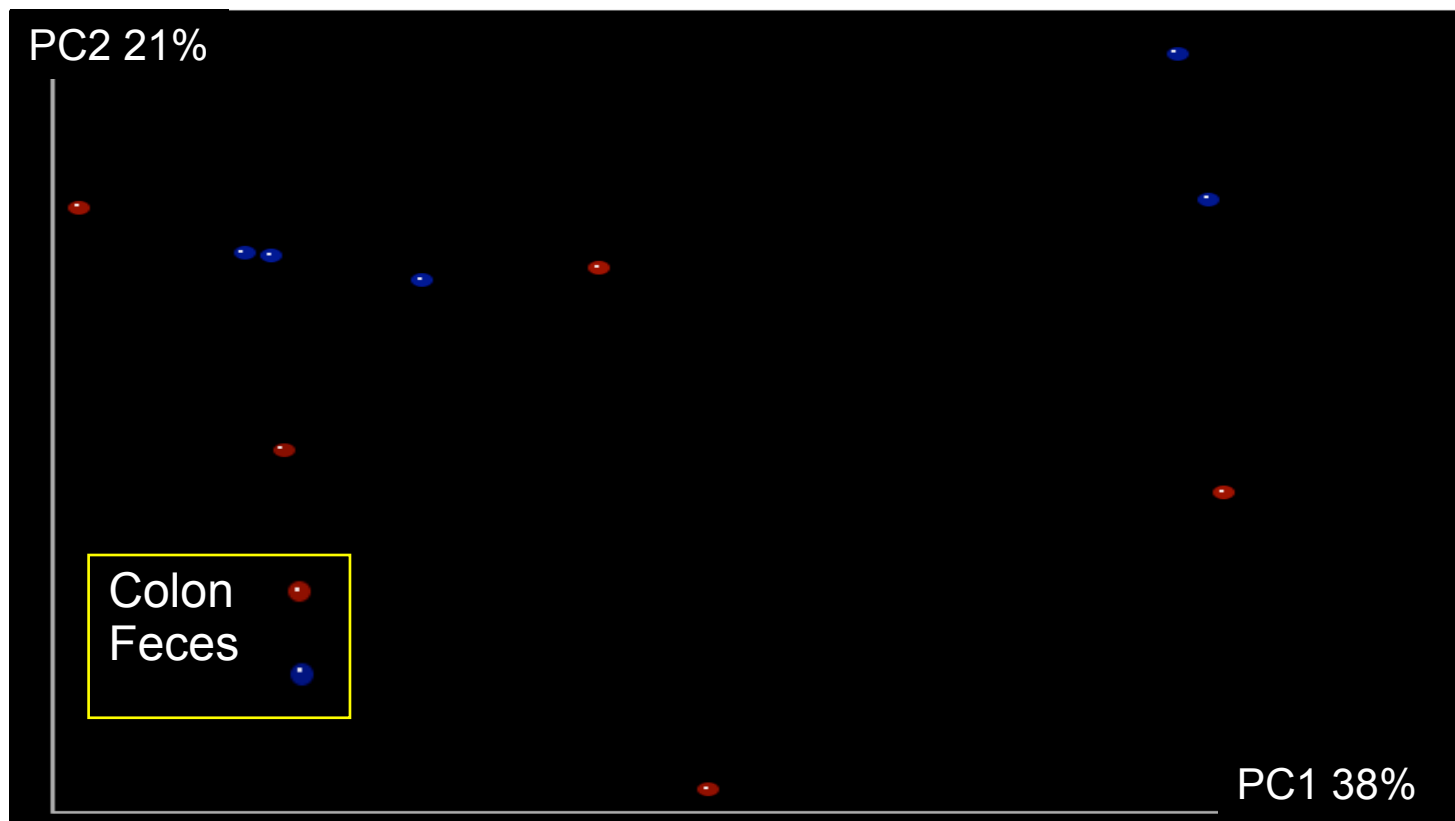

Figure S3. PCoA of bacterial communities from colon content (red) and feces (blue) from 5 adult female mice.
