# Supplementary material for: Biphasic assembly of the murine intestinal microbiota during early development
Source: PubMed Central journal article supplement — ISME J. 2013 Mar 28;7(6):1112–5. doi: 10.1038/ismej.2013.15 (PMC3660675; doi:10.1038/ismej.2013.15), 2013-03-28
Supplement: ismej201315x10.pdf [file ismej201315x10.pdf]

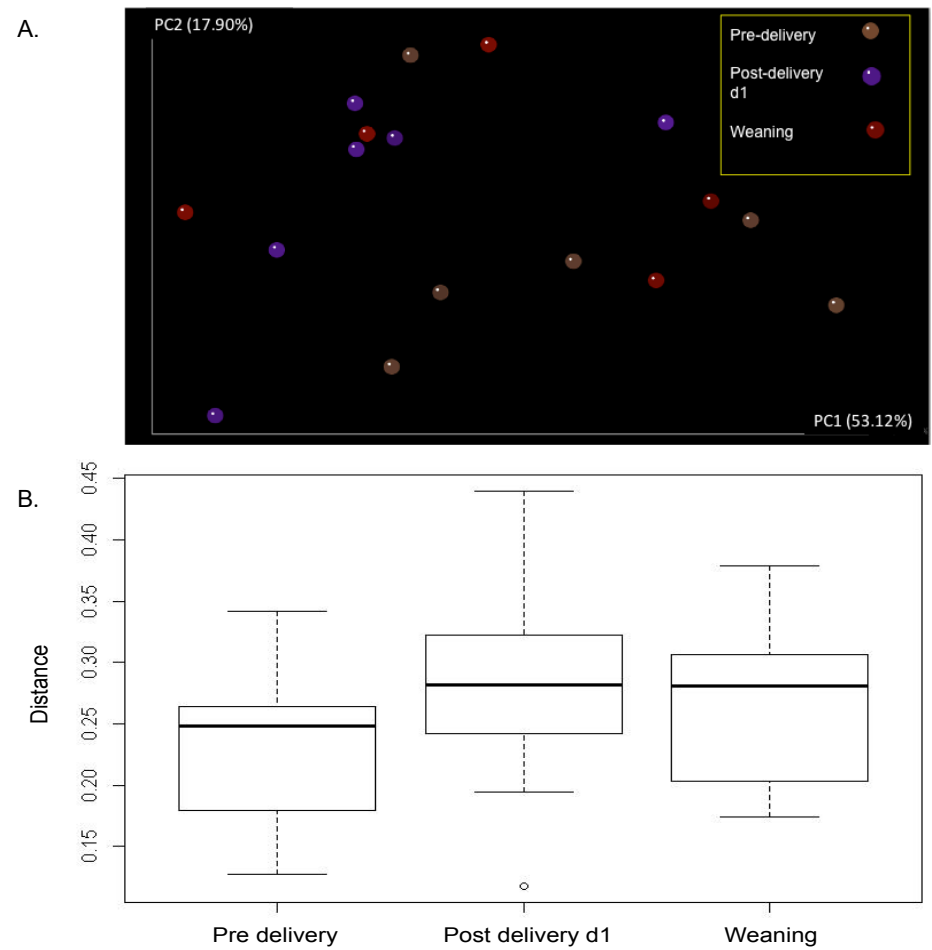

**Figure S9. Fecal bacterial communities in 6 female mice. Mothers at different stages (prior to pregnancy (34 days old) and post-delivery day 1 and 21 (weaning)). A) PCoA; B) Pairwise Unifrac distances. Differences are not significant (ANOVA  $P=0.124$ ).**
