# Supplementary material for: Biphasic assembly of the murine intestinal microbiota during early development
Source: PubMed Central journal article supplement — ISME J. 2013 Mar 28;7(6):1112–5. doi: 10.1038/ismej.2013.15 (PMC3660675; doi:10.1038/ismej.2013.15), 2013-03-28
Supplement: ismej201315x13.pdf [file ismej201315x13.pdf]

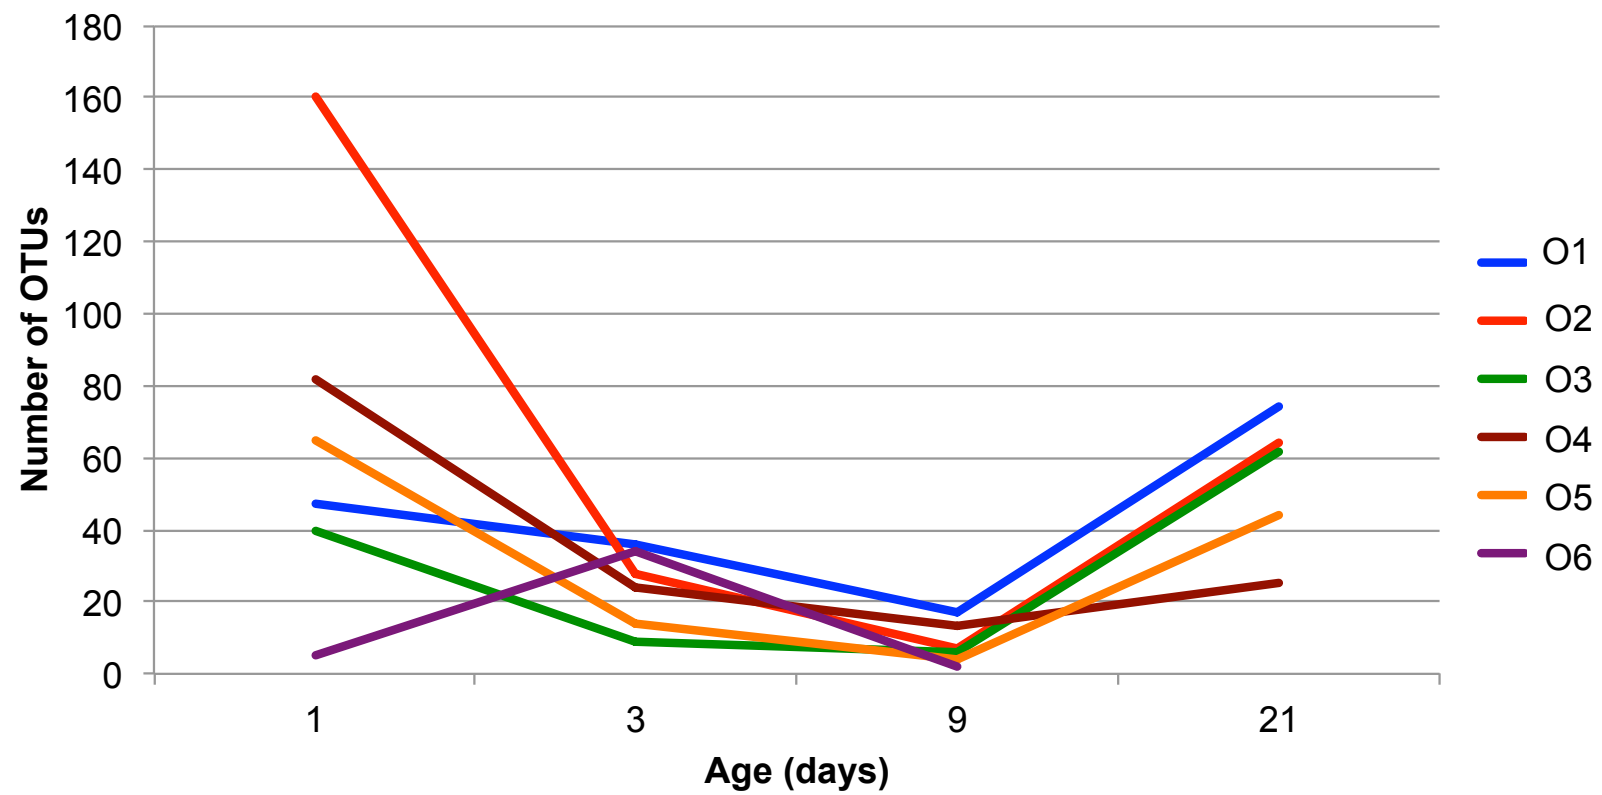

**Figure S12.** Number of bacterial OTUs in each of the 6 newborn mice by age. Six mice were sampled across the first 21 days of life.
