# Supplementary material for: Biphasic assembly of the murine intestinal microbiota during early development
Source: PubMed Central journal article supplement — ISME J. 2013 Mar 28;7(6):1112–5. doi: 10.1038/ismej.2013.15 (PMC3660675; doi:10.1038/ismej.2013.15), 2013-03-28
Supplement: ismej201315x15.pdf [file ismej201315x15.pdf]

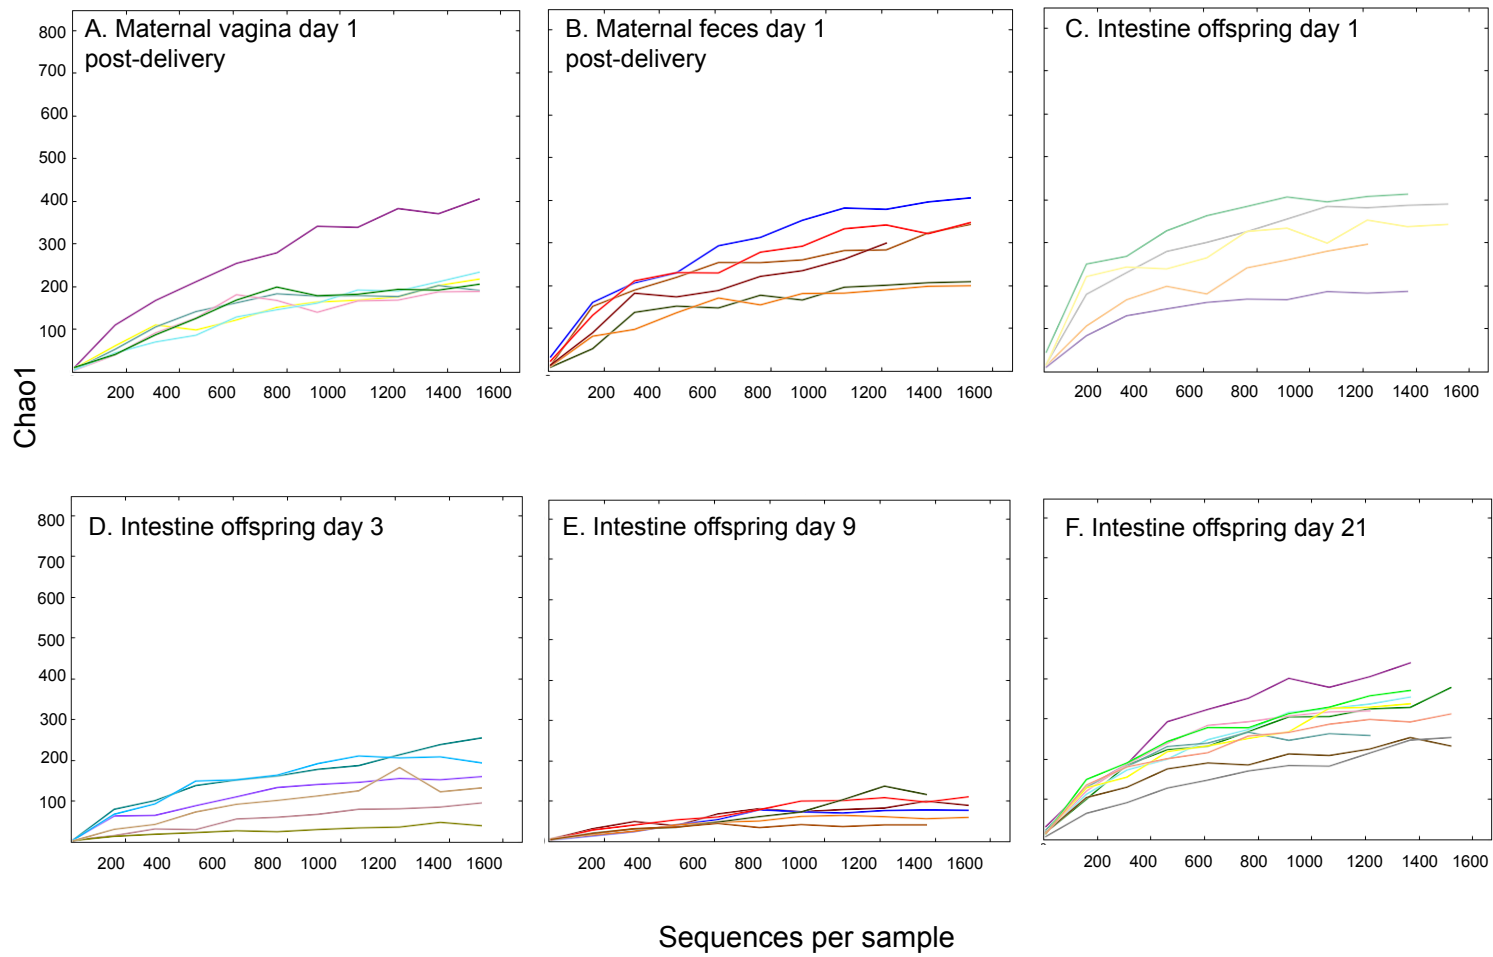

**Figure S14. Rarefaction curves of Chao1 from mothers and offspring mice.** Panel A, maternal vagina, day 1 post-delivery; Panel B, maternal feces, day 1 post-delivery; Panel C, offspring intestine, day 1 of life; Panel D, offspring intestine, day 3 of life; Panel E, offspring intestine, day 9 of life; Panel F, offspring intestine, day 21 of life.
