# Supplementary material for: Biphasic assembly of the murine intestinal microbiota during early development
Source: PubMed Central journal article supplement — ISME J. 2013 Mar 28;7(6):1112–5. doi: 10.1038/ismej.2013.15 (PMC3660675; doi:10.1038/ismej.2013.15), 2013-03-28
Supplement: ismej201315x17.pdf [file ismej201315x17.pdf]

**Table S1: Proportions of bacterial taxa in the feces of adult mice.**

| Phylum                               | Percentage (%) | Taxa                                          | Percentage (%) | StDev          |       |      |
|--------------------------------------|----------------|-----------------------------------------------|----------------|----------------|-------|------|
| Firmicutes                           | 52.34          | Lachnospiraceae                               | 34.7           | 15.42          |       |      |
|                                      |                | Lactobacillaceae ( <i>Lactobacillus</i> )     | 5.09           | 4.59           |       |      |
|                                      |                | Clostridiales                                 | 3.67           | 2.03           |       |      |
|                                      |                | Ruminococcaceae                               | 3.47           | 1.55           |       |      |
|                                      |                | Lachnospiraceae ( <i>Bryantella</i> )         | 1.8            | 1.18           |       |      |
|                                      |                | Lachnospiraceae Incertae Sedis                | 0.88           | 0.49           |       |      |
|                                      |                | Bacillales                                    | 0.84           | 1.92           |       |      |
|                                      |                | Staphylococcaceae ( <i>Staphylococcus</i> )   | 0.78           | 1.63           |       |      |
|                                      |                | Clostridia                                    | 0.39           | 0.79           |       |      |
|                                      |                | Staphylococcaceae ( <i>Jeotgalicoccus</i> )   | 0.39           | 0.97           |       |      |
|                                      |                | Unknown                                       | 0.24           | 0.28           |       |      |
|                                      |                | Ruminococcaceae Incertae Sedis                | 0.06           | 0.09           |       |      |
|                                      |                | Streptococcaceae ( <i>Streptococcus</i> )     | 0.01           | 0.03           |       |      |
|                                      |                | Bacteroidetes                                 | 42.09          | Unknown        | 24.07 | 9.31 |
|                                      |                |                                               |                | Prevotellaceae | 13.7  | 6.91 |
| Bacteroides                          | 3.5            |                                               |                | 4.44           |       |      |
| Rikenellaceae ( <i>Alistipes</i> )   | 0.54           |                                               |                | 0.46           |       |      |
| Bacteroidales                        | 0.17           |                                               |                | 0.16           |       |      |
| Prevotellaceae ( <i>Prevotella</i> ) | 0.05           |                                               |                | 0.09           |       |      |
| Rikenellaceae ( <i>Rikenella</i> )   | 0.05           |                                               |                | 0.09           |       |      |
| Unknown                              | 4.82           |                                               |                | 1.82           |       |      |
| Proteobacteria                       | 0.68           | Unknown                                       | 0.307          | 0.72           |       |      |
|                                      |                | Helicobacteraceae ( <i>Helicobacter</i> )     | 0.22           | 0.21           |       |      |
|                                      |                | Deltaproteobacteria                           | 0.09           | 0.13           |       |      |
|                                      |                | Enterobacteriaceae                            | 0.05           | 0.08           |       |      |
|                                      |                | Unknown                                       | 0.18           | 0.25           |       |      |
| TM7                                  | 0.18           | genera_incertae_sedis                         | 0.18           | 0.25           |       |      |
| Tenericutes                          | 0.12           | Anaeroplasmataceae ( <i>Anaeroplasma</i> )    | 0.12           | 0.14           |       |      |
| Actinobacteria                       | 0.04           | Corynebacteriaceae ( <i>Corynebacterium</i> ) | 0.03           | 0.04           |       |      |
|                                      |                | Coriobacteriaceae                             | 0.01           | 0.03           |       |      |
| Deferribacteres                      | 0.01           | Deferribacteraceae ( <i>Mucispirillum</i> )   | 0.01           | 0.03           |       |      |

**Unknown=** Short reads with no assigned taxonomy by RDP below phylum level.
