# Supplementary material for: Biphasic assembly of the murine intestinal microbiota during early development
Source: PubMed Central journal article supplement — ISME J. 2013 Mar 28;7(6):1112–5. doi: 10.1038/ismej.2013.15 (PMC3660675; doi:10.1038/ismej.2013.15), 2013-03-28
Supplement: ismej201315x18.pdf [file ismej201315x18.pdf]

**Table S2. Percentage of taxa in the mother's vagina and feces and in the offspring intestine at day 1, 3 and 9, and 21 of age.**

|                 |                                                              | Mean and Standard Deviation |                        |                         |              |               |               |               |
|-----------------|--------------------------------------------------------------|-----------------------------|------------------------|-------------------------|--------------|---------------|---------------|---------------|
|                 |                                                              | Mothers                     |                        |                         | Offspring    |               |               |               |
| Phylum          | Family (Genus)                                               | Vagina                      | Feces                  |                         | Intestine    |               |               | Feces         |
|                 |                                                              | d1Post-delivery (N=6)       | d1 Post-delivery (N=6) | d21 Post-delivery (N=5) | Day1 (N=6)   | Day 3 (N=6)   | Day 9 (N=6)   | Day 21 (N=10) |
| Proteobacteria  | Rhodobacteraceae (Paracoccus)                                | 45.30 ± 6.72                | 0.00                   | 0.00                    | 0.01 ± 0.03  | 0.00          | 0.00          | 0.00          |
| Proteobacteria  | Sphingomonadaceae (Sphingomonas)                             | 30.92 ± 5.23                | 0.00                   | 0.00                    | 0.02 ± 0.05  | 0.00          | 0.00          | 0.00          |
| Firmicutes      | Streptococcaceae (Streptococcus)                             | 8.95 ± 5.82                 | 0.03 ± 0.06            | 0.06 ± 0.13             | 41.25 ± 24.7 | 45.82 ± 36.31 | 13.75 ± 7.76  | 2.06 ± 5.87   |
| Firmicutes      | Staphylococcaceae (Staphylococcus)                           | 3.71 ± 1.27                 | 0.11 ± 0.13            | 0.05 ± 0.12             | 3.16 ± 3.30  | 3.00 ± 5.83   | 0.00          | 0.01 ± 0.02   |
| Proteobacteria  | Pasteurellaceae (Pasteurella)                                | 2.80 ± 2.91                 | 0.00                   | 0.00                    | 4.01 ± 5.74  | 17.24 ± 11.10 | 14.57 ± 14.86 | 0.03 ± 0.05   |
| Firmicutes      | Incertae Sedis XI (Gemella)                                  | 1.47 ± 1.07                 | 0.00                   | 0.00                    | 0.00         | 0.65 ± 1.50   | 3.80 ± 3.23   | 0.01 ± 0.03   |
| Firmicutes      | Lachnospiraceae                                              | 0.84 ± 1.05                 | 16.46 ± 12.45          | 18.57 ± 13.00           | 2.43 ± 2.97  | 0.07 ± 0.09   | 0.09 ± 0.20   | 24.22 ± 13.99 |
| Bacteroidetes   | Porphyromonadaceae (Porphyromonas)                           | 0.71 ± 1.18                 | 0.00                   | 0.00                    | 0.01 ± 0.03  | 0.00          | 0.00          | 0.00          |
| Actinobacteria  | Corynebacteriaceae (Corynebacterium)                         | 0.56 ± 0.41                 | 0.93 ± 1.42            | 0.00                    | 0.73 ± 0.99  | 0.30 ± 0.34   | 0.05 ± 0.08   | 0.02 ± 0.07   |
| Firmicutes      | Bacillaceae 1 (Bacillus a)                                   | 0.54 ± 0.42                 | 0.00                   | 0.00                    | 0.26 ± 0.28  | 0.01 ± 0.02   | 0.00          | 0.00          |
| Bacteria        | Unknown                                                      | 0.53 ± 0.45                 | 11.90 ± 6.71           | 10.79 ± 7.08            | 7.69 ± 7.06  | 0.45 ± 0.42   | 0.13 ± 0.15   | 5.63 ± 6.36   |
| Proteobacteria  | Helicobacteriaceae (Helicobacter)                            | 0.39 ± 0.74                 | 0.25 ± 0.44            | 0.14 ± 0.31             | 0.67 ± 1.39  | 0.02 ± 0.03   | 0.03 ± 0.08   | 0.63 ± 0.67   |
| Firmicutes      | Lactobacillaceae (Lactobacillus)                             | 0.33 ± 0.41                 | 7.74 ± 6.64            | 22.42 ± 14.54           | 0.59 ± 0.65  | 29.34 ± 33.46 | 63.84 ± 19.56 | 18.68 ± 16.87 |
| Proteobacteria  | Moraxellaceae (Psychrobacter)                                | 0.30 ± 0.32                 | 0.14 ± 0.19            | 0.02 ± 0.05             | 0.40 ± 0.78  | 0.02 ± 0.06   | 0.00          | 0.00          |
| Firmicutes      | Carnobacteriaceae (Carnobacteriaceae 1)                      | 0.29 ± 0.53                 | 0.00                   | 0.00                    | 0.40 ± 0.50  | 0.48 ± 0.33   | 2.48 ± 3.62   | 0.02 ± 0.05   |
| Firmicutes      | Enterococcaceae (Enterococcus)                               | 0.28 ± 0.25                 | 0.00                   | 0.00                    | 0.03 ± 0.06  | 0.00          | 0.00          | 0.00          |
| Proteobacteria  | Pseudomonadaceae (Pseudomonas)                               | 0.25 ± 0.13                 | 0.00                   | 0.00                    | 0.09 ± 0.07  | 0.00          | 0.00          | 0.00          |
| Firmicutes      | Clostridiales                                                | 0.23 ± 0.26                 | 4.63 ± 4.12            | 3.63 ± 2.55             | 1.74 ± 1.36  | 0.06 ± 0.04   | 0.04 ± 0.10   | 17.68 ± 9.03  |
| Proteobacteria  | Enterobacteriaceae                                           | 0.23 ± 0.17                 | 0.00                   | 0.05 ± 0.10             | 0.13 ± 0.18  | 0.06 ± 0.09   | 0.27 ± 0.44   | 0.40 ± 0.35   |
| Firmicutes      | Jeotgaliococcus                                              | 0.20 ± 0.21                 | 0.35 ± 0.52            | 0.00                    | 0.15 ± 0.12  | 0.01 ± 0.02   | 0.00          | 0.00          |
| Cyanobacteria   | Streptophyta                                                 | 0.20 ± 0.21                 | 0.03 ± 0.05            | 0.02 ± 0.04             | 2.78 ± 2.13  | 0.28 ± 0.34   | 0.01 ± 0.03   | 0.10 ± 0.08   |
| Firmicutes      | Ruminococcaceae                                              | 0.18 ± 0.19                 | 2.74 ± 2.11            | 1.26 ± 0.81             | 0.63 ± 0.67  | 0.03 ± 0.03   | 0.01 ± 0.03   | 3.01 ± 2.02   |
| Bacteroidetes   | Prevotellaceae                                               | 0.17 ± 0.11                 | 27.40 ± 16.17          | 7.60 ± 7.94             | 3.85 ± 4.10  | 0.20 ± 0.24   | 0.05 ± 0.07   | 0.78 ± 0.62   |
| Proteobacteria  | Xanthomonadaceae (Stenotrophomonas)                          | 0.16 ± 0.17                 | 0.00                   | 0.00                    | 0.08 ± 0.13  | 0.01 ± 0.02   | 0.00          | 0.00          |
| Firmicutes      | Aerococcaceae (Facklamia)                                    | 0.12 ± 0.11                 | 0.02 ± 0.04            | 0.02 ± 0.05             | 0.23 ± 0.30  | 0.01 ± 0.03   | 0.00          | 0.00          |
| Bacteroidetes   | Bacteroidaceae (Bacteroides)                                 | 0.10 ± 0.15                 | 2.99 ± 3.98            | 1.29 ± 2.24             | 0.41 ± 0.59  | 0.04 ± 0.09   | 0.00          | 23.17 ± 18.81 |
| Firmicutes      | Clostridiaceae 1 (Clostridium)                               | 0.04 ± 0.08                 | 1.26 ± 3.10            | 1.15 ± 2.56             | 0.00         | 0.01 ± 0.02   | 0.00          | 0.00          |
| Firmicutes      | Lachnospiraceae (Bryantella)                                 | 0.03 ± 0.05                 | 1.31 ± 1.13            | 1.14 ± 1.16             | 0.05 ± 0.09  | 0.00          | 0.00          | 0.62 ± 0.73   |
| Bacteroidetes   | Flavobacteriaceae                                            | 0.03 ± 0.03                 | 0.00                   | 0.00                    | 0.43 ± 0.83  | 0.05 ± 0.09   | 0.09 ± 0.10   | 0.00          |
| Firmicutes      | Clostridia                                                   | 0.03 ± 0.05                 | 0.15 ± 0.28            | 0.06 ± 0.13             | 0.37 ± 0.28  | 0.03 ± 0.08   | 0.09 ± 0.23   | 0.29 ± 0.40   |
| Proteobacteria  | Pasteurellaceae                                              | 0.03 ± 0.05                 | 0.00                   | 0.00                    | 7.22 ± 11.25 | 0.73 ± 1.29   | 0.4 ± 0.55    | 0.00          |
| Firmicutes      | Erysipelotrichaceae (Turicibacter)                           | 0.03 ± 0.05                 | 16.21 ± 20.88          | 26.98 ± 13.71           | 0.34 ± 0.46  | 0.00          | 0.00          | 0.06 ± 0.12   |
| Bacteroidetes   | Rikenellaceae (Rikenella)                                    | 0.02 ± 0.05                 | 0.10 ± 0.16            | 0.09 ± 0.16             | 0.04 ± 0.09  | 0.00          | 0.00          | 0.02 ± 0.05   |
| Proteobacteria  | Desulfovibrionaceae (Desulfovibrio)                          | 0.02 ± 0.05                 | 0.02 ± 0.05            | 0.00                    | 0.00         | 0.00          | 0.00          | 0.08 ± 0.24   |
| Firmicutes      | Lachnospiraceae (Lachnospiraceae Incertae Sedis)             | 0.01 ± 0.03                 | 0.82 ± 0.47            | 0.71 ± 0.61             | 0.12 ± 0.13  | 0.01 ± 0.02   | 0.00          | 1.07 ± 0.62   |
| Firmicutes      | Erysipelotrichaceae (Erysipelotrichaceae Incertae Sedis)     | 0.01 ± 0.03                 | 0.10 ± 0.26            | 0.98 ± 1.70             | 0.00         | 0.00          | 0.00          | 0.33 ± 0.64   |
| Firmicutes      | Bacillales                                                   | 0.01 ± 0.02                 | 0.03 ± 0.07            | 0.00                    | 0.01 ± 0.03  | 0.00          | 0.00          | 0.00          |
| Firmicutes      | Veillonellaceae                                              | 0.01 ± 0.02                 | 0.00                   | 0.00                    | 0.33 ± 0.27  | 0.00          | 0.00          | 0.00          |
| Actinobacteria  | Propionibacteriaceae (Propionibacterium)                     | 0.00                        | 0.00                   | 0.00                    | 0.13 ± 0.27  | 0.22 ± 0.55   | 0.00          | 0.00          |
| Actinobacteria  | Coriobacteriaceae                                            | 0.00                        | 0.15 ± 0.23            | 0.28 ± 0.31             | 0.04 ± 0.09  | 0.00          | 0.00          | 0.10 ± 0.24   |
| Bacteroidetes   | Bacteroidales                                                | 0.00                        | 2.53 ± 3.02            | 0.34 ± 0.41             | 0.01 ± 0.03  | 0.00          | 0.00          | 0.07 ± 0.08   |
| Bacteroidetes   | Prevotellaceae (Prevotella)                                  | 0.00                        | 0.27 ± 0.24            | 0.02 ± 0.05             | 0.00         | 0.00          | 0.00          | 0.04 ± 0.08   |
| Bacteroidetes   | Rikenellaceae (Alistipes)                                    | 0.00                        | 0.34 ± 0.31            | 0.15 ± 0.20             | 0.08 ± 0.18  | 0.01 ± 0.02   | 0.00          | 0.01 ± 0.05   |
| Deferribacteres | Deferribacteraceae (Mucispirillum)                           | 0.00                        | 0.00                   | 0.00                    | 0.01 ± 0.03  | 0.02 ± 0.05   | 0.00          | 0.18 ± 0.45   |
| Firmicutes      | Carnobacteriaceae 1 (Isobaculum)                             | 0.00                        | 0.00                   | 0.00                    | 0.43 ± 1.05  | 0.65 ± 1.47   | 0.25 ± 0.39   | 0.00          |
| Firmicutes      | Lachnospiraceae (Butyrivibrio)                               | 0.00                        | 0.00                   | 0.00                    | 0.42 ± 0.46  | 0.02 ± 0.05   | 0.00          | 0.00          |
| Firmicutes      | Erysipelotrichaceae (Coprobacillus)                          | 0.00                        | 0.00                   | 0.58 ± 1.30             | 0.00         | 0.00          | 0.00          | 0.00          |
| Firmicutes      | Ruminococcaceae (Ruminococcaceae Incertae Sedis)             | 0.00                        | 0.00                   | 0.04 ± 0.05             | 0.00         | 0.00          | 0.00          | 0.08 ± 0.11   |
| Firmicutes      | Peptostreptococcaceae (Peptostreptococcaceae Incertae Sedis) | 0.00                        | 0.15 ± 0.36            | 1.29 ± 1.42             | 0.00         | 0.00          | 0.00          | 0.05 ± 0.07   |
| Proteobacteria  | Deltaproteobacteria                                          | 0.00                        | 0.04 ± 0.07            | 0.06 ± 0.09             | 0.02 ± 0.04  | 0.00          | 0.00          | 0.42 ± 0.50   |
| Proteobacteria  | Pasteurellaceae (Mannheimia)                                 | 0.00                        | 0.00                   | 0.00                    | 1.52 ± 3.03  | 0.04 ± 0.07   | 0.04 ± 0.10   | 0.00          |
| TM7;TM7         | genera incertae sedis                                        | 0.00                        | 0.28 ± 0.38            | 0.22 ± 0.14             | 0.03 ± 0.05  | 0.00          | 0.00          | 0.10 ± 0.20   |
