# Supplementary material for: Biphasic assembly of the murine intestinal microbiota during early development
Source: PubMed Central journal article supplement — ISME J. 2013 Mar 28;7(6):1112–5. doi: 10.1038/ismej.2013.15 (PMC3660675; doi:10.1038/ismej.2013.15), 2013-03-28
Supplement: ismej201315x19.pdf [file ismej201315x19.pdf]

**Table S3. Richness of intestinal bacterial OTUs identified in offspring mice during development.**

| <b>Offspring Age (days)</b> | <b>Number of animals</b> | <b>OTUs (Average±SD)</b>   | <b>Change in mean number of OTUs from previous time-point</b> | <b>% Change</b> |
|-----------------------------|--------------------------|----------------------------|---------------------------------------------------------------|-----------------|
| 1                           | 6                        | 66.5 ± 52.6 <sup>a,b</sup> | -                                                             | -               |
| 3                           | 6                        | 24.2 ± 10.8 <sup>a</sup>   | -43                                                           | -64.2           |
| 9                           | 6                        | 8.2 ± 5.7 <sup>b,c</sup>   | -16                                                           | -66.7           |
| 21                          | 10                       | 53.7 ± 18.4 <sup>c</sup>   | +46                                                           | +675.0          |

Superscript letters indicate values that are statistically different: <sup>a</sup>day 1 vs. day 3 (*p value* 0.047); <sup>b</sup>day 1 vs. day 9 (*p value* 0.005); <sup>c</sup>day 9 vs. day 21 (*p value* 0.014).
