# Supplementary figures and images for: Biphasic assembly of the murine intestinal microbiota during early development
Source: PubMed Central journal article supplement — ISME J. 2013 Mar 28;7(6):1112–5. doi: 10.1038/ismej.2013.15 (PMC3660675; doi:10.1038/ismej.2013.15), 2013-03-28

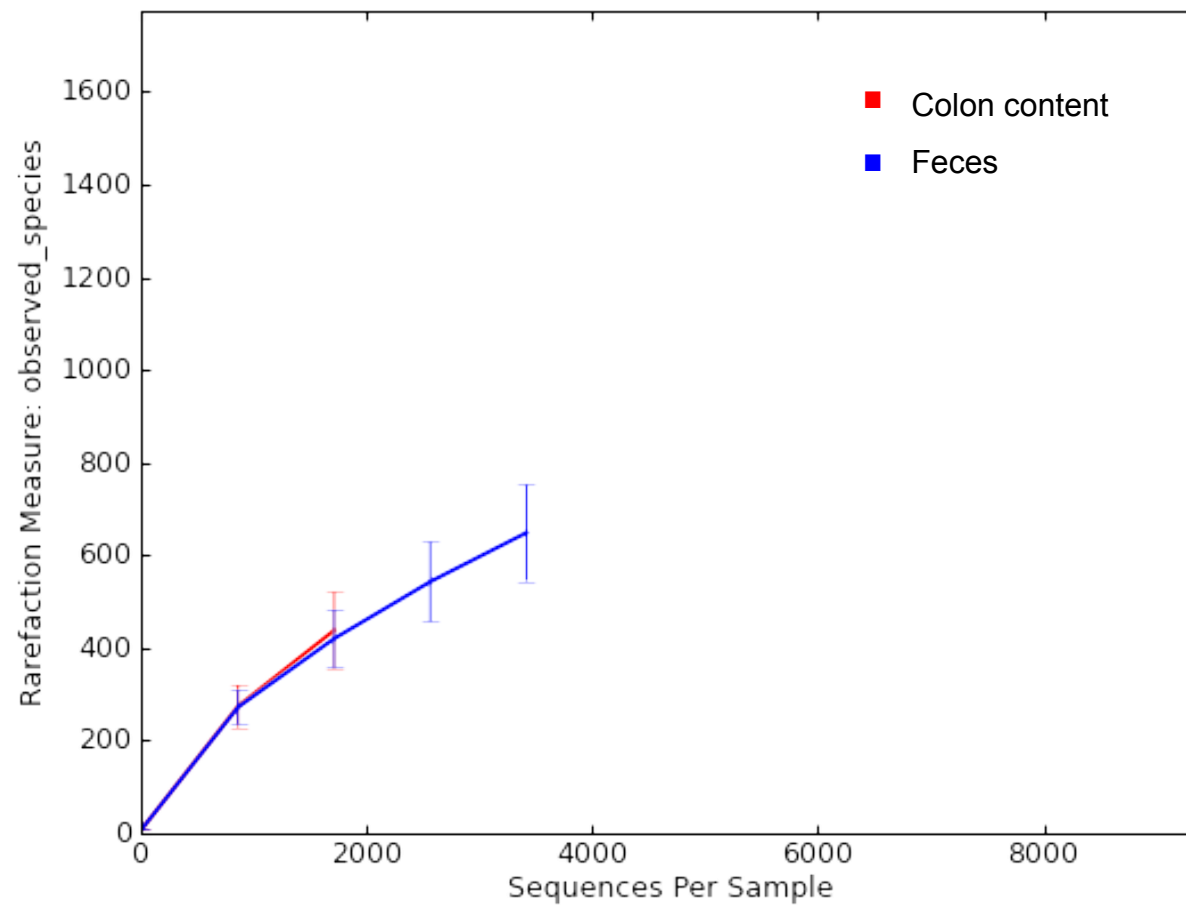

**Figure S2. Rarefaction curve of observed species from mice colon content (red) and feces (blue).**

Supplement: ismej201315x3.pdf [file ismej201315x3.pdf]

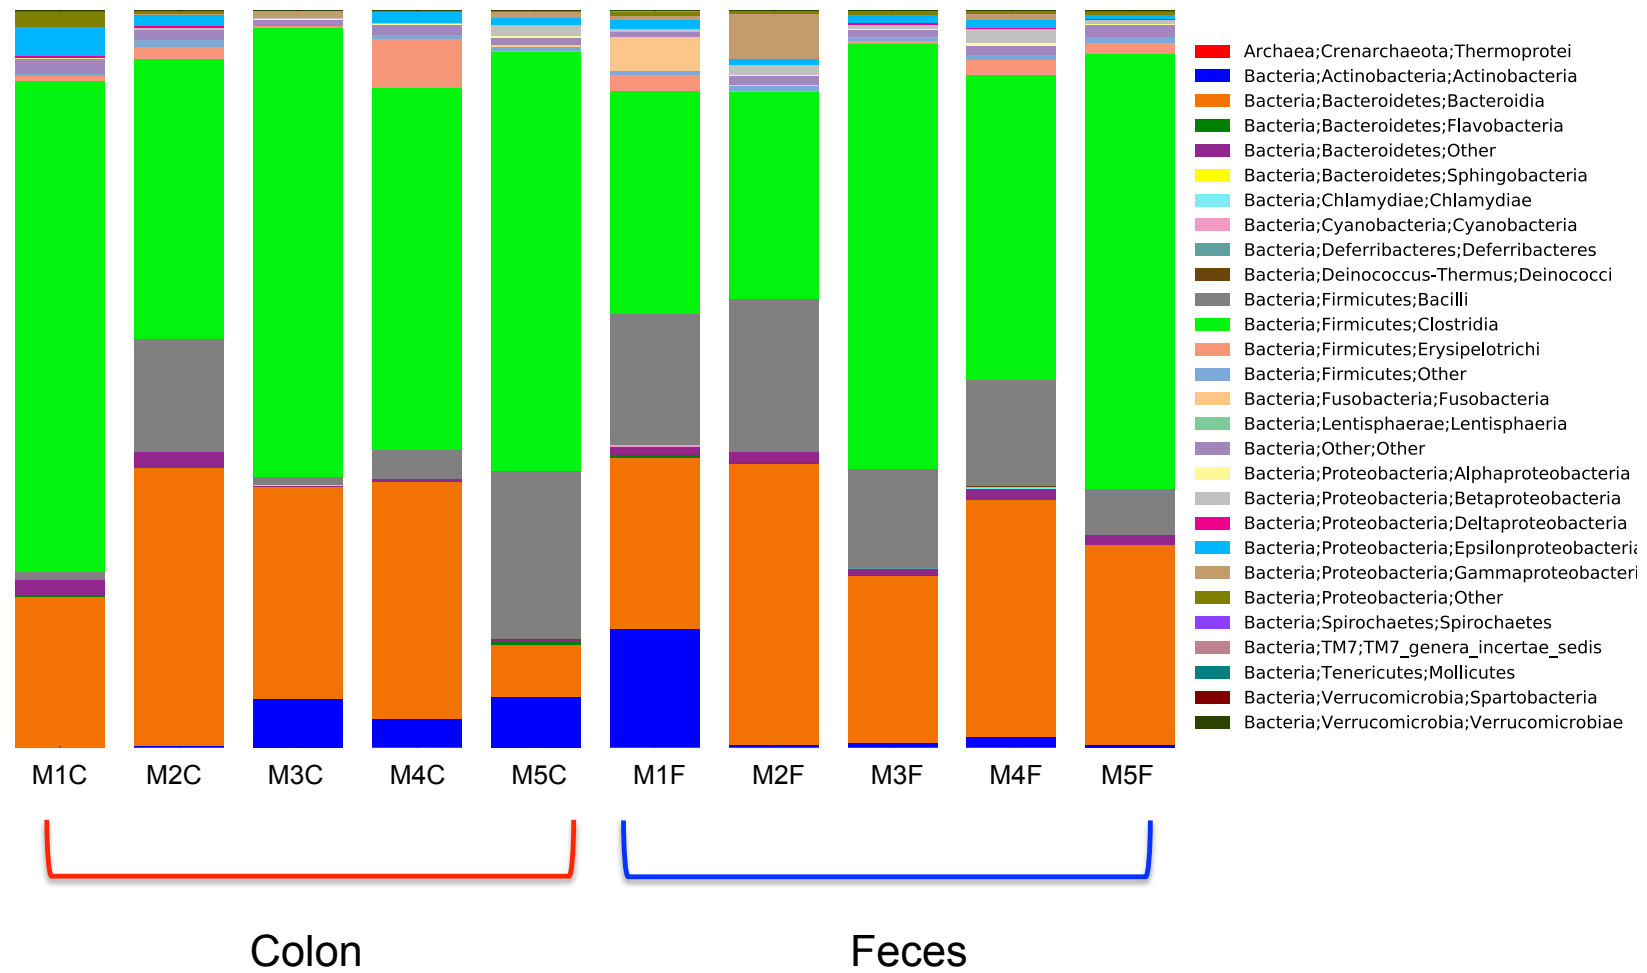

Figure S5. Proportions of colon and feces bacterial taxa from female adult mice.

Supplement: ismej201315x6.pdf [file ismej201315x6.pdf]

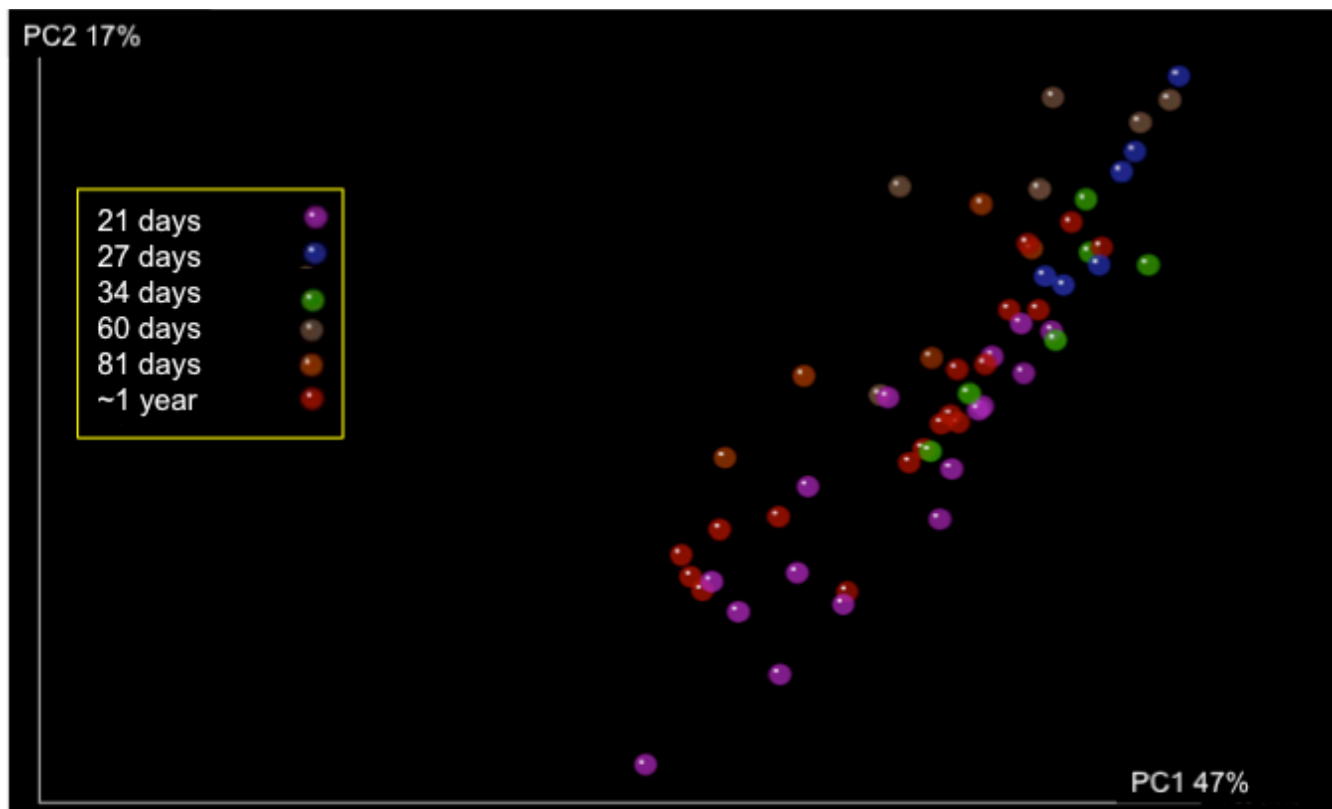

Figure S7. PCoA of the fecal bacterial communities of adult mice as they age (21, 27 34, 6, 81 days and 1 year).

Supplement: ismej201315x8.pdf [file ismej201315x8.pdf]

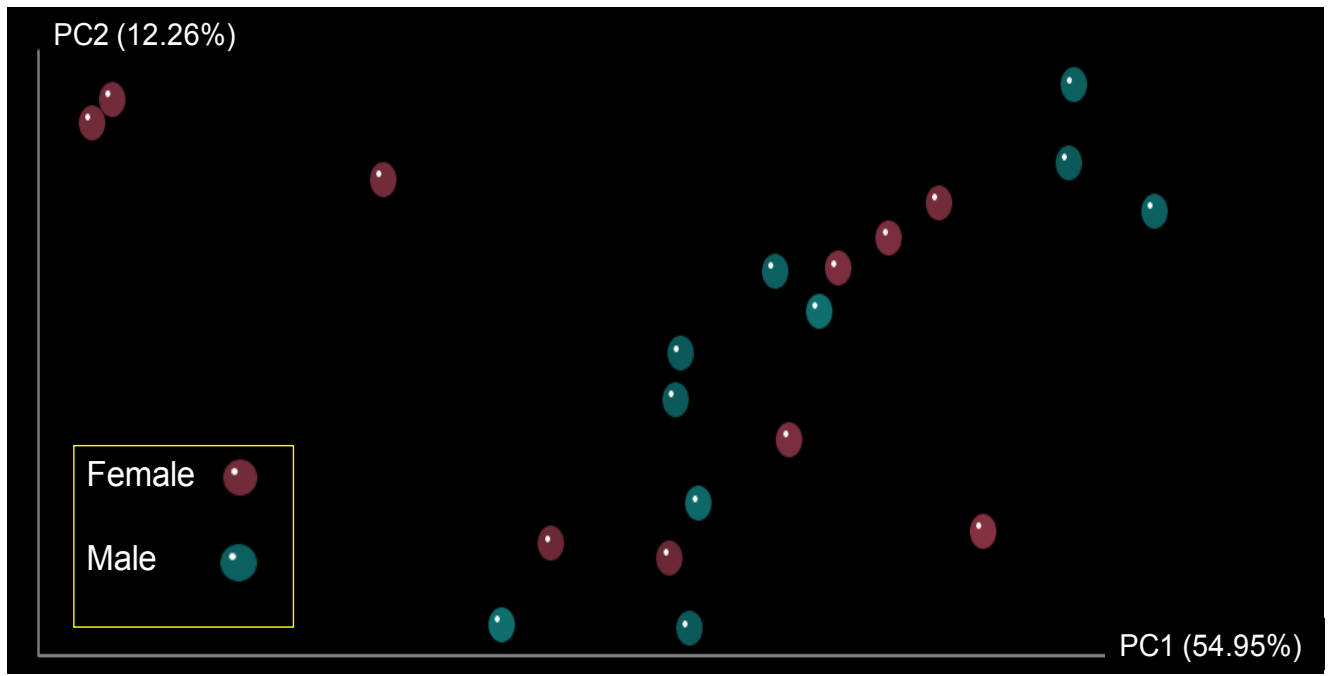

Figure S8. PCoA of fecal bacterial communities of adult, 21-28 day old females and males.

Supplement: ismej201315x9.pdf [file ismej201315x9.pdf]
